# Supplementary material for: Improved light emission of MoS2 monolayers by constructing AlN/MoS2 core–shell nanowires
Source: Royal Society of Chemistry journal article supplement (doi:10.1039/c7tc03231e), 2017-01-01
Supplement: c7tc03231e1.pdf [file c7tc03231e1.pdf]

Supporting information for

## Improved light emission of MoS<sub>2</sub> monolayer by constructing AlN/MoS<sub>2</sub> core-shell nanowires

Fei Chen,<sup>a,b</sup> Ting Wang,<sup>a,b</sup> Lei Wang,<sup>a</sup> Xiaohong Ji,<sup>a\*</sup> Qinyuan Zhang<sup>a,b</sup>

<sup>a</sup> *School of Materials Science and Engineering, South China University of Technology,  
Guangzhou 510641, China*

<sup>b</sup> *State Key Laboratory of Luminescent Materials and Devices, and Institute of Optical  
Communication Materials, South China University of Technology, Guangzhou 510641, China*

**\*Corresponding authors**

E-mail: [jxhong@scut.edu.cn](mailto:jxhong@scut.edu.cn) (X. H. Ji)

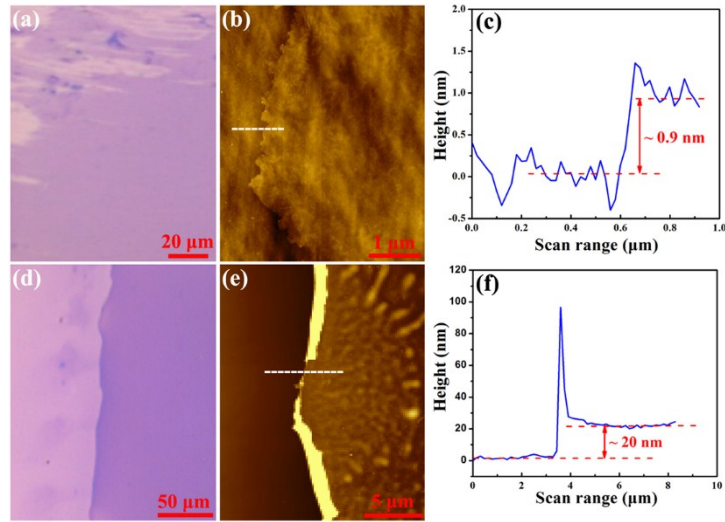

Fig. S1 The optical image, AFM, and height profile of the MoS<sub>2</sub> film obtained at different Mo sputtering time: (a)-(c) 15 s, (d)-(f) 45 s.

Table S1 Summary of A<sub>1g</sub>, E<sup>1</sup><sub>2g</sub>, and Δ of CVD-grown MoS<sub>2</sub> monolayer

| Substrate                      | A <sub>1g</sub> (cm <sup>-1</sup> ) | E <sup>1</sup> <sub>2g</sub> (cm <sup>-1</sup> ) | Δ (cm <sup>-1</sup> ) | Reference |
|--------------------------------|-------------------------------------|--------------------------------------------------|-----------------------|-----------|
| SiO <sub>2</sub> /Si           | 405.1                               | 384.6                                            | 20.5                  | 1         |
| SiO <sub>2</sub> /Si           | —                                   | —                                                | 20.6                  | 2         |
| SiO <sub>2</sub> /Si           | 403.3                               | 383                                              | 20.3                  | 3         |
| SiO <sub>2</sub> /Si           | —                                   | —                                                | 19-21                 | 4         |
| SiO <sub>2</sub> /Si           | 405                                 | 384.7                                            | 20.3                  | 5         |
| SiO <sub>2</sub> /Si           | 404.4                               | 383.8                                            | 20.6                  | 6         |
| Mica                           | 407                                 | 387                                              | 20                    | 7         |
| SiO <sub>2</sub> /Si           | —                                   | —                                                | 21                    | 8         |
| Sapphire                       | 405                                 | 305                                              | 20                    | 9         |
| Au foil                        | 406.9                               | 387.0                                            | 19.9                  | 10        |
| Sapphire                       | 405                                 | 384                                              | 21                    | 11        |
| SiO <sub>2</sub> /Si           | 404                                 | 383                                              | 21                    | 12        |
| Graphene/ SiO <sub>2</sub> /Si | —                                   | —                                                | 21.3                  | 13        |
| SiO <sub>2</sub> /Si           | 405.9                               | 385.7                                            | 20.2                  | 14        |
| SiO <sub>2</sub> /Si           | 404.5                               | 384.5                                            | 20                    | 15        |
| SiO <sub>2</sub> /Si           | 404                                 | 383                                              | 21                    | 16        |
| SiO <sub>2</sub> /Si           | —                                   | —                                                | 20.9                  | 17        |
| SiO <sub>2</sub> /Si           | 404.4                               | 384.0                                            | 20.4                  | 18        |
| SiO <sub>2</sub> /Si           | 404                                 | 383                                              | 21                    | 19        |
| Al <sub>2</sub> O <sub>3</sub> | 404.9                               | 384.7                                            | 20.2                  | 20        |
| SiO <sub>2</sub> /Si           | —                                   | —                                                | 18.2                  | 21        |
| SiO <sub>2</sub> /Si           | 385.8                               | 403.8                                            | 18                    | 22        |

## Reference

1. Y. J. Zhan, Z. Liu, S. Najmaei, P. M. Ajayan and J. Lou, *Small*, 2011, **8**, 966-971.
2. S. Najmaei, Z. Liu, W. Zhou, X. L. Zou, G. Shi, S. D. Lei, B. I. Yakobson, J. C. Idrobo, P. M. Ajayan and J. Lou, *Nat. Mater.*, 2013, **12**, 754-759.
3. G. Z. Zhang, J. W. Wang, Z. F. Wu, R. Shi, W. K. Ouyang, A. Amini, N. Wang and C. Cheng, *ACS Appl. Mater. Interfaces*, 2017, **9**, 763-770.
4. B. L. Liu, L. Chen, G. Liu, A. N. Abbas, M. Fathi and C. W. Zhou, *ACS Nano*, 2014, **8**, 5304-5314.
5. S. S. Wang, Y. M. Rong, Y. Fan, M. Pacios, H. Bhaskaran, K. He and J. H. Warner, *Chem. Mater.*, 2014, **26**, 6371-6379.
6. I. S. Kim, V. K. Sangwan, D. Jariwala, J. D. Wood, S. Park, K. S. Chen, F. Y. Shi, F. Ruizepeda, A. Ponce, M. Jose-Yacamán, V. P. Dravid, T. J. Marks, M. C. Hersam and L. J. Lauhon, *ACS Nano*, 2014, **8**, 10551-10558.
7. Q. Q. Ji, Y. F. Zhang, T. Gao, Y. Zhang, D. L. Ma, M. X. Liu, Y. B. Chen, X. F. Qiao, P. H. Tan, M. Kan, J. Feng, Q. Sun and Z. F. Liu, *Nano Lett.*, 2013, **13**, 3870-3877.
8. S. X. Huang, X. Ling, L. B. Liang, J. Kong, H. Terrones, V. Meunier and M. S. Dresselhaus, *Nano Lett.*, 2014, **14**, 5500.
9. Q. Q. Ji, M. Kan, Y. Zhang, Y. Guo, D. L. Ma, J. P. Shi, Q. Sun, Q. Chen, Y. F. Zhang and Z. F. Liu, *Nano Lett.*, 2015, **15**, 198-205.
10. J. P. Shi, D. L. Ma, G. F. Han, Y. Zhang, Q. Q. Ji, T. Gao, J. Y. Sun, X. J. Song, C. Li, Y. S. Zhang, X. Y. Lang, Y. F. Zhang and Z. F. Liu, *ACS Nano*, 2014, **8**, 10196-10204.
11. S. F. Wu, C. M. Huang, G. Aivazian, J. S. Ross, D. H. Cobden and X. D. Xu, *ACS Nano*, 2013, **7**, 2768-2772.
12. Z. Lin, M. T. Thee, A. L. Elias, S. M. Feng, C. J. Zhou, K. Fujisawa, N. Perealópez, V. Carozo, H. Terrones and M. Terrones, *APL Mater.*, 2014, **2**, 092514.
13. K. M. McCreary, A. T. Hanbicki, J. T. Robinson, E. Cobas, J. C. Culbertson, A. L. Friedman, G. G. Jernigan and B. T. Jonker, *Adv. Funct. Mater.*, 2014, **5**, 6449-6454.
14. J. G. Song, S. J. Kim, W. J. Woo, Y. Kim, I. K. Oh, G. H. Ryu, Z. Lee, J. H. Lim, J. Park and H. Kim, *ACS Appl. Mater. Interfaces*, 2016, **8**, 28130-28135.
15. J. Li, C. L. Hu, H. Wu, Z. X. Liu, S. Cheng, W. F. Zhang, H. B. Shu and H. X. Chang, *Cryst. Growth Des.*, 2016, **16**, 7094-7101.
16. H.C. Liu, Y. H. Zhu, Q. L. Meng, X. W. Lu, S. Kong, Z. W. Huang, P. Jiang and X. H. Bao, *Nano Res.*, 2017, **10**, 643-651.
17. S. Y. Yang, G. W. Shim, S. B. Seo and S. Y. Choi, *Nano Res.*, 2017, **10**, 255-262.
18. Y. Wan, H. Zhang, W. Wang, B. W. Sheng, K. Zhang, Y. L. Wang, Q. J. Song, N. N. Mao, Y. P. Li, X. Q. Wang, J. Zhang and L. Dai, *Small*, 2015, **12**, 198-203.
19. J. Y. Zheng, X. G. Yan, Z. X. Lu, H. L. Qiu, G. C. Xu, Xu. Zhou, P. Wang, X. Q. Pan, K. H. Liu and L. Y. Jiao, *Adv. Mater.*, 2017, **29**, 1604540.
20. H. Bergeron, V. K. Sangwan, J. J. Mcmorrow, G. P. Campbell, I. Balla, X. L. Liu, M. J. Bedzyk, T. J. Marks and M. C. Hersam, *Appl. Phys. Lett.*, 2017, **110**, 053101.
21. W. J. Zhang, J. K. Huang, C. H. Chen, Y. H. Chang, Y. J. Cheng and L. J. Li, *Adv. Mater.*, 2013, **25**, 3456-3461.
22. Y. H. Lee, X. Q. Zhang, W. J. Zhang, M. T. Chang, C. T. Lin, K. D. Chang, Y. C. Yu, J. T. W.

Wang, C. S. Chang, L. J. Li and T. W. Lin, *Adv. Mater.*, **24**, 2320-2325.
